# Supplementary material for: Rewiring cellular metabolism via the AKT/mTOR pathway contributes to host defence against Mycobacterium tuberculosis in human and murine cells
Source: PubMed Central journal article supplement — Eur J Immunol. 2016 Sep 27;46(11):2574–86. doi: 10.1002/eji.201546259 (PMC5129526; doi:10.1002/eji.201546259), 2016-09-27
Supplement: EJI-46-2574-s002.pdf [file EJI-46-2574-s002.pdf]

# European Journal of Immunology

Supporting Information

for

DOI 10.1002/eji.201546259

Ekta Lachmandas, Macarena Beigier-Bompadre, Shih-Chin Cheng, Vinod Kumar, Arjan van Laarhoven, Xinhui Wang, Anne Ammerdorffer, Lily Boutens, Dirk de Jong, Thirumala-Devi Kanneganti, Mark S. Gresnigt, Tom H.M. Ottenhoff, Leo A.B. Joosten, Rinke Stienstra, Cisca Wijmenga, Stefan H.E. Kaufmann, Reinout van Crevel and Mihai G. Netea

**Rewiring cellular metabolism via the AKT/mTOR pathway contributes to host defence against *Mycobacterium tuberculosis* in human and murine cells**

## Supporting Information Figure 1

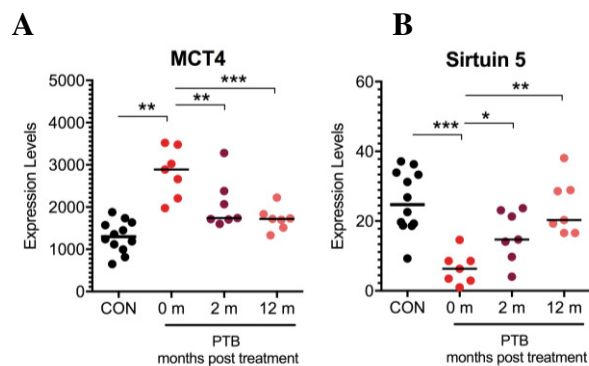

### Supporting Information Figure 1. Transcriptional Regulation of Glucose Metabolism

(A-B) Data are represented as mean scatter plots for gene expression of MCT4 and Sirtuin 5 in LTBI and PTB individuals in the South African validation cohort of Berry et al. [13] and in controls and PTB patients on 0 m, 2 m or 12 m of treatment with anti-tubercular drugs. Symbols represent individual samples and data are shown as means. Means were compared using the Mann-Whitney U test. \* $p < 0.05$ , \*\* $p < 0.01$ , \*\*\* $p < 0.001$ .

## Supporting Information Figure 2.

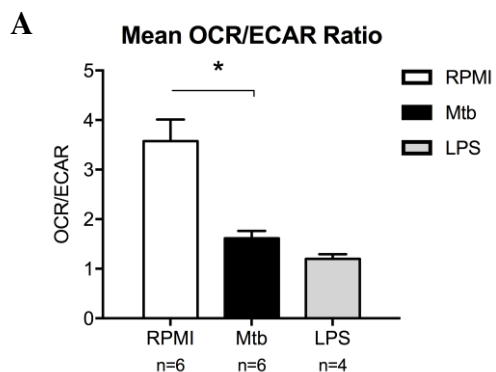

### Supporting Information Figure 2. Physiology of the Metabolic Response to Mtb Stimulation

(A) CD14<sup>+</sup> monocytes were stimulated for 24 h with Mtb lysate (n=6) and LPS (n=4) and the resulting ECAR and OCR rates were determined using the Seahorse metabolic analyser. Three baseline measurements were determined. Data are shown as means  $\pm$  SEM of n = 4 to 6 from a single experiment. Means were compared using the Wilcoxon signed-rank test (\*p<0.05).

### Supporting Information Figure 3

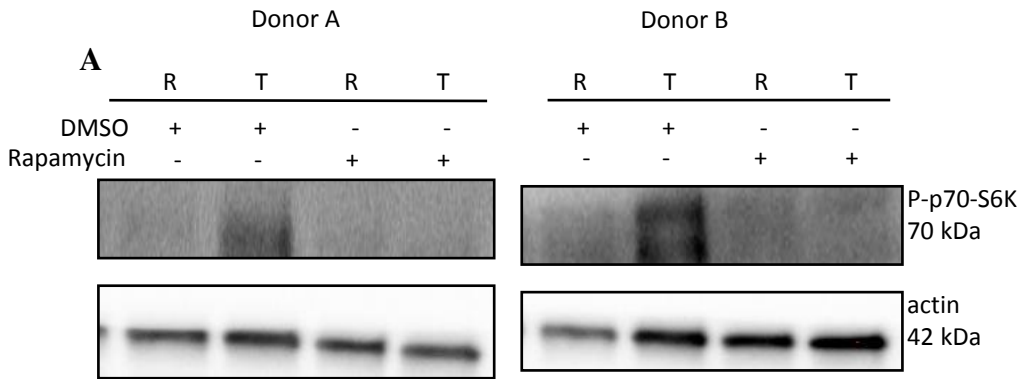

**Supporting Information Figure 3. Induction of Glycolysis is Mediated by the AKT-mTOR Pathway**  
(A) CD14<sup>+</sup> monocytes pre-incubated with DMSO (vehicle control) or rapamycin (mTOR inhibitor) were stimulated with RPMI (R) or Mtb lysate (T) for 2 h. Cell lysates were analysed by Western blot for phosphorylation of p70-S6K and actin levels using specific antibodies. Blots from two donors are shown.

## Supporting Information Figure 4.

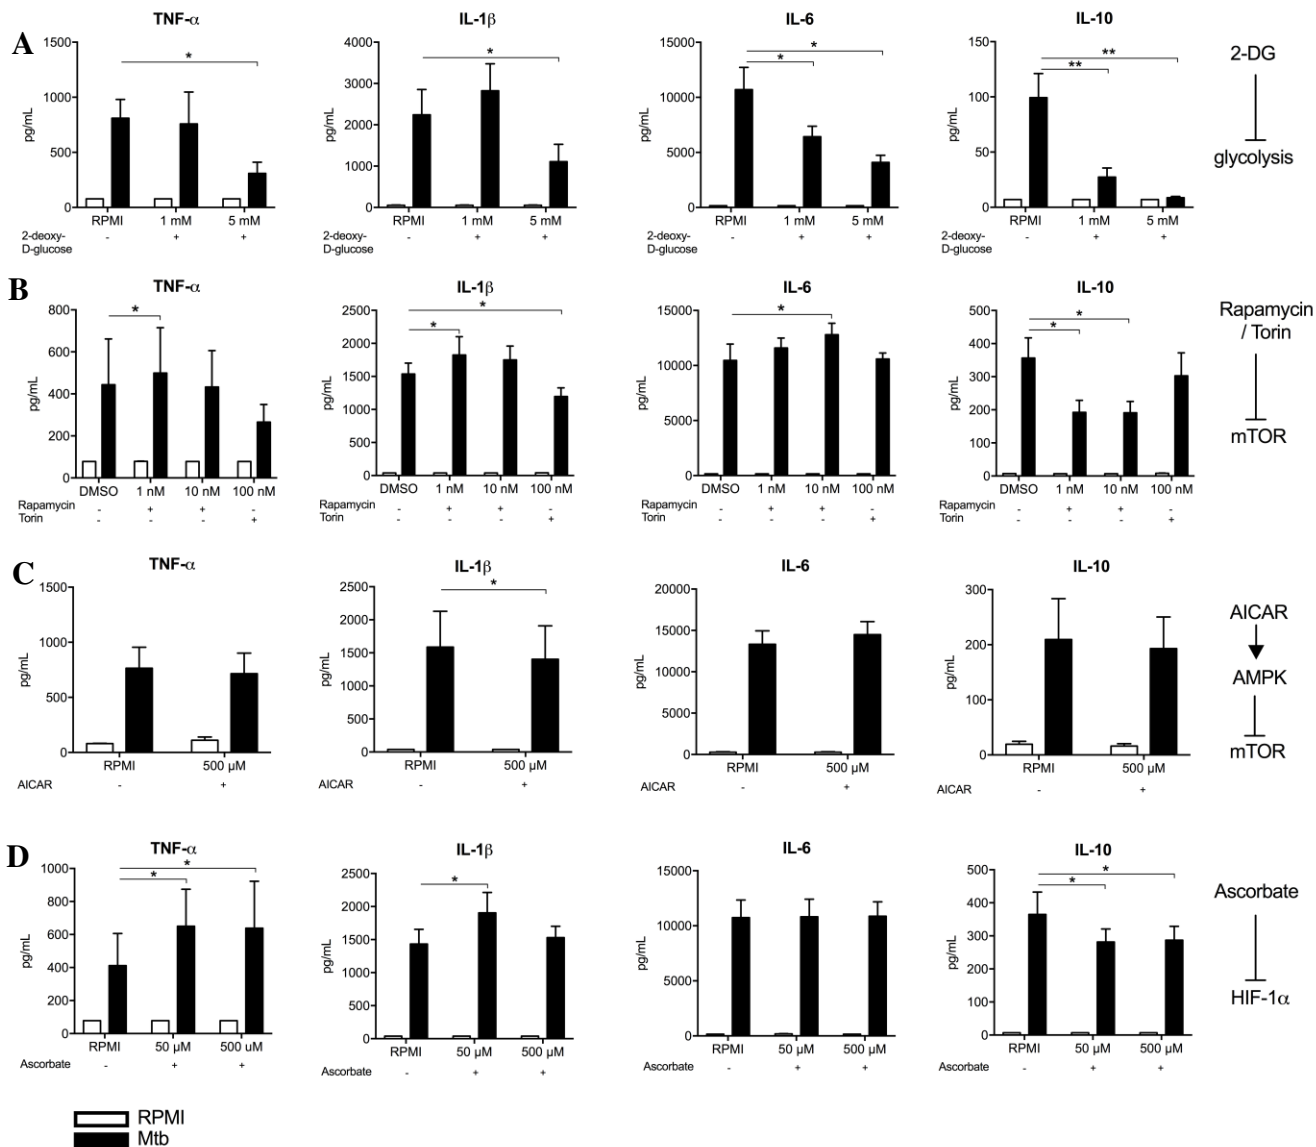

**Supporting Information Figure 4.** Regulation of Monocyte-Derived Cytokines by Aerobic Glycolysis (A-D) PBMCs were pre-incubated with DMSO (vehicle control) or (A) 1 mM or 5 mM 2DG, (B) 1 nM or 10 nM rapamycin, 100 nM torin, (C) 500  $\mu$ M AICAR or (D) 50  $\mu$ M or 500  $\mu$ M ascorbate or for 1 h prior to stimulation with Mtb lysate. TNF- $\alpha$ , IL-1 $\beta$ , IL-6 and IL-10 levels were measured from culture supernatants by ELISA. Data are shown as means  $\pm$  SEM of n = 6 to 9 pooled from three independent experiments. Means were compared using the Wilcoxon signed-rank test (\*p<0.05, \*\*p<0.01).

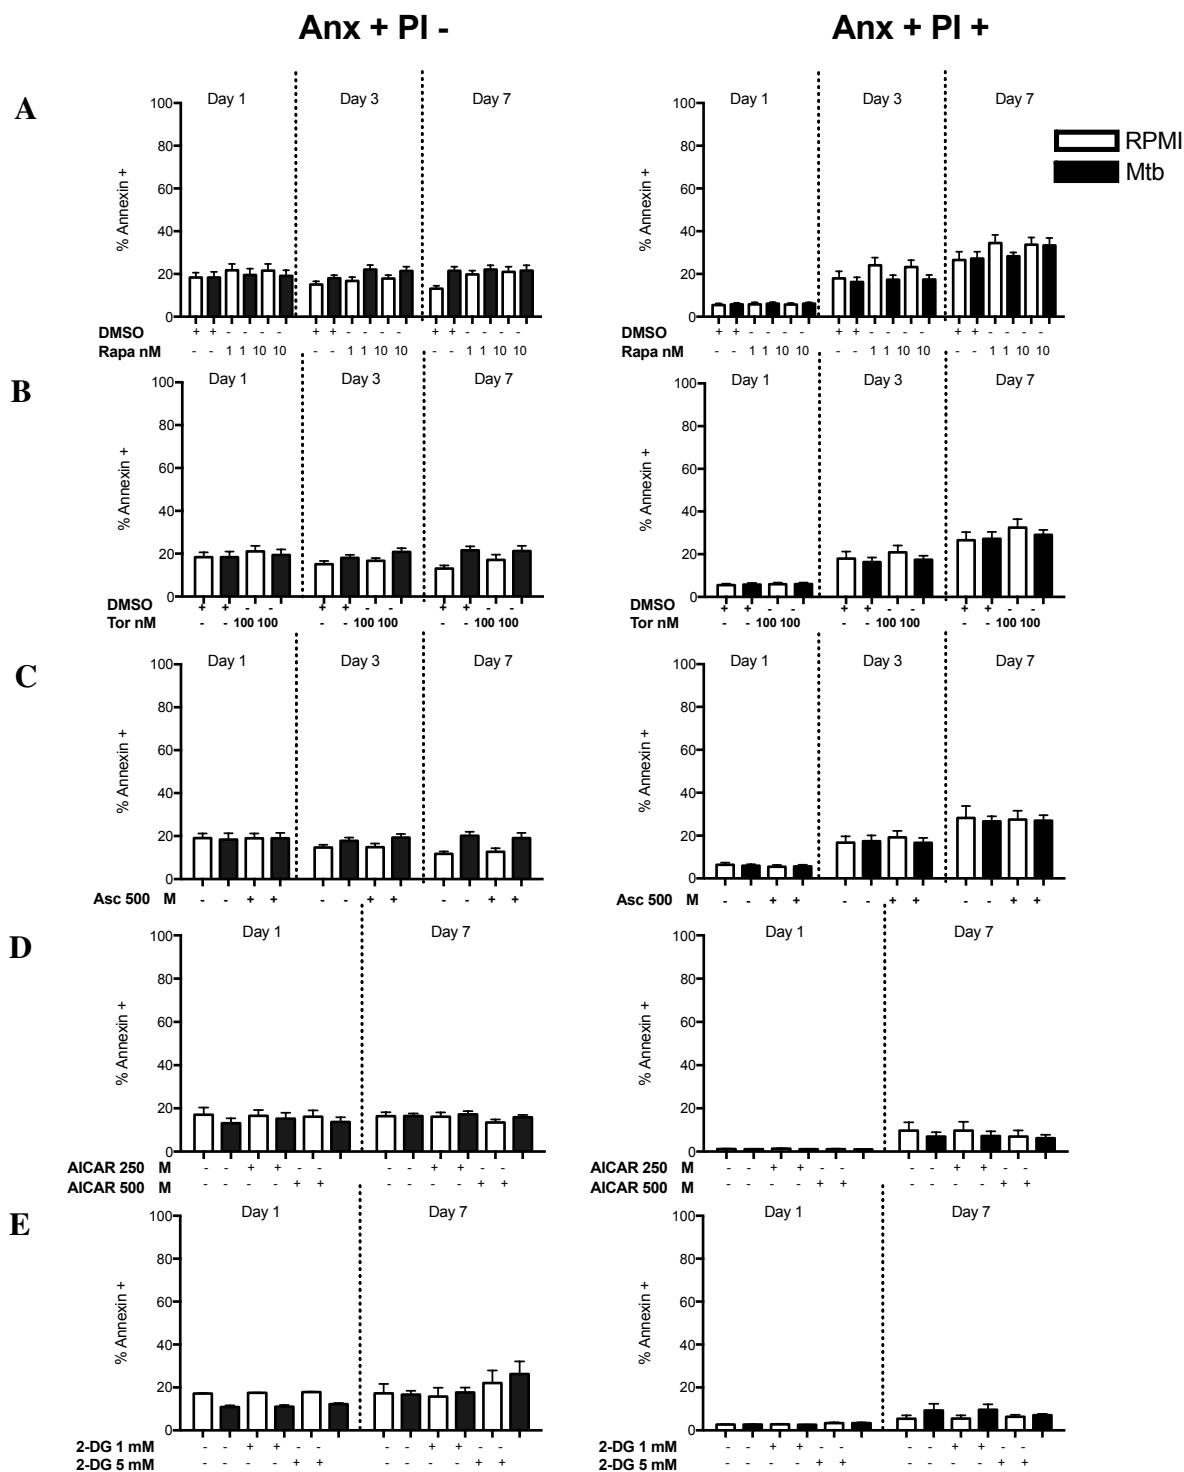

### Supporting Information Figure 5. Effects of Metabolic Pathway Inhibitors on Cell Death

(A–E) PBMCs were pre-incubated with DMSO (vehicle control) or (A) 1 mM or 5 mM 2DG, (B) 1 nM or 10 nM rapamycin, 100 nM torin, (C) 500  $\mu$ M AICAR or (D) 50  $\mu$ M or 500  $\mu$ M ascorbate or for 1 h prior to stimulation with Mtb lysate for 1, 3 or 7 d after which the cells were harvested and stained with an Annexin-V / PI stain to determine levels of cell death. Data are shown as means  $\pm$  SEM of  $n = 4$  to 6 pooled from three independent experiments. Means were compared using the Wilcoxon signed-rank test.

**Supporting Information Figure 6.**

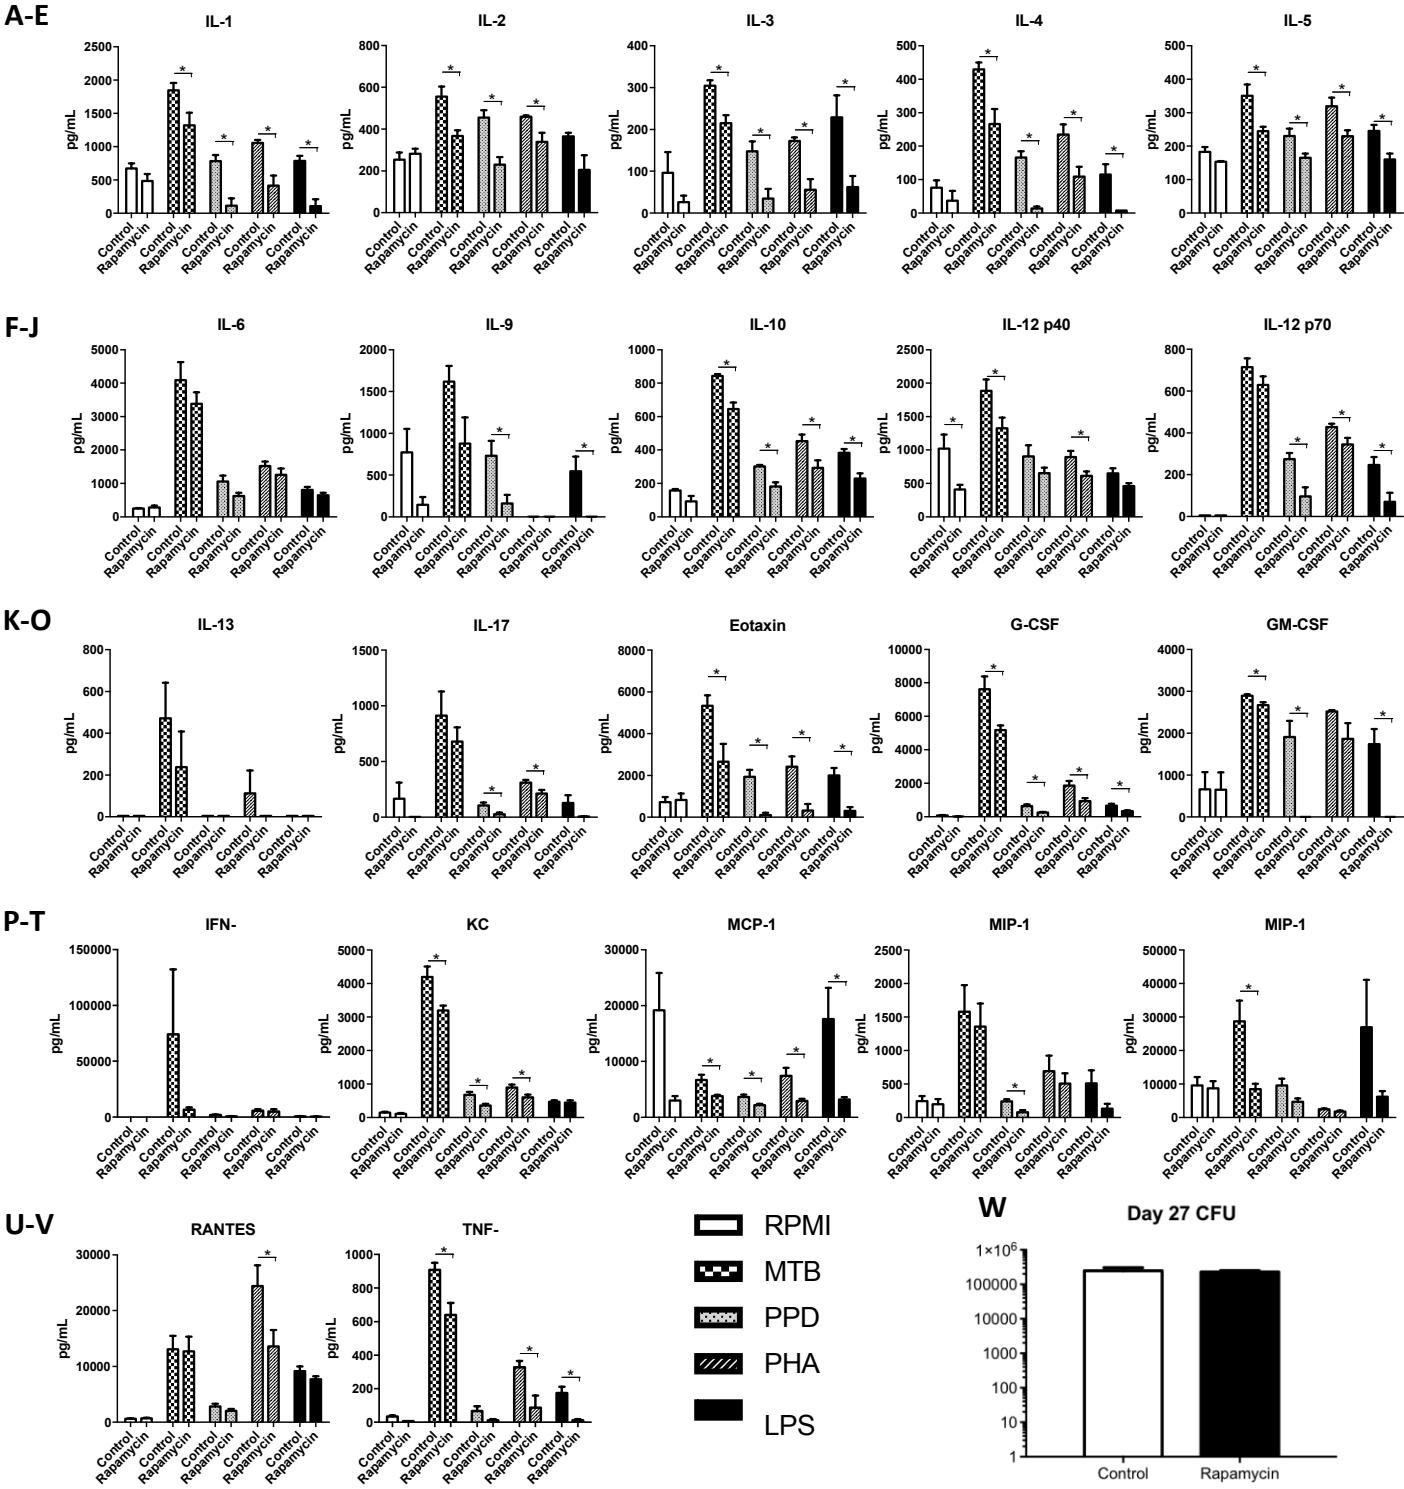

**Supporting Information Figure 6.** In vivo Effects of Rapamycin on Ex vivo Splenocyte Restimulation (A–W) C57/BL6 mice were treated with rapamycin or vehicle (mixed PBS/100% EtOH) from 1 day prior to aerosol infection until 28 d post-infection. Mice were euthanized. Splenocytes were harvested and re-stimulated with Mtb lysate, PPD, PHA or LPS for 6 d after which a bead-based immunoassay was performed (A–U). Lung homogenates were harvested and CFUs plated and counted after three weeks (W). Data are shown as means  $\pm$  SEM of n =6 samples from a single experiment. Means were compared using the Mann–Whitney U test (\*p<0.05).
